# Supplementary material
Source: ML conference proceedings conference paper supplement (https://openreview.net/forum?id=rFb8y8Io5e9)

NLL on real data ( $\tau = 10, \kappa = 2$ )

correlation=0.94 (0.86,0.99)

0.7

1

2

KL on testbed ( $\tau = 10, \kappa = 2$ )

5

3

2

agent

- mlp
- ensemble
- dropout
- bbb
- hypermodel
- ensemble+
- sgmcmc

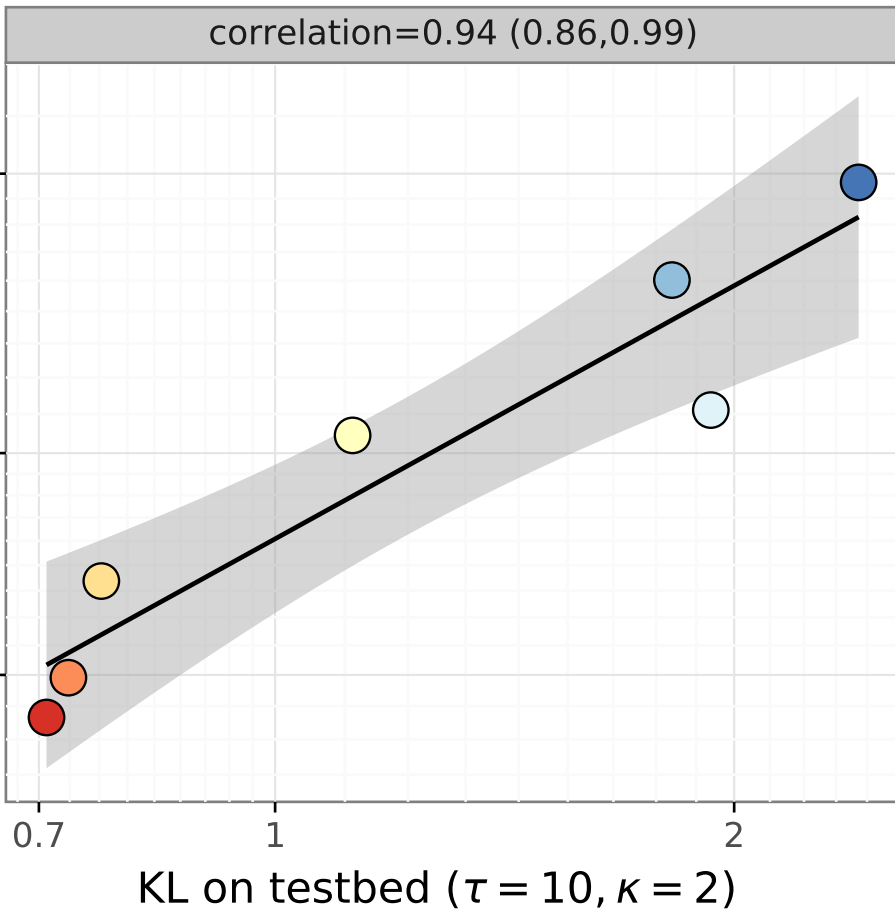

Supplement: supplementary_material [file attachment]
