# Supplementary material
Source: ML conference proceedings conference paper supplement (https://openreview.net/forum?id=rFb8y8Io5e9)
Supplement: supplementary_material [file attachment]

minimum  $\tau$  such that  
 $d_{KL}^\tau(\text{prior}) < \frac{1}{2} d_{KL}^\tau(\text{uniform})$

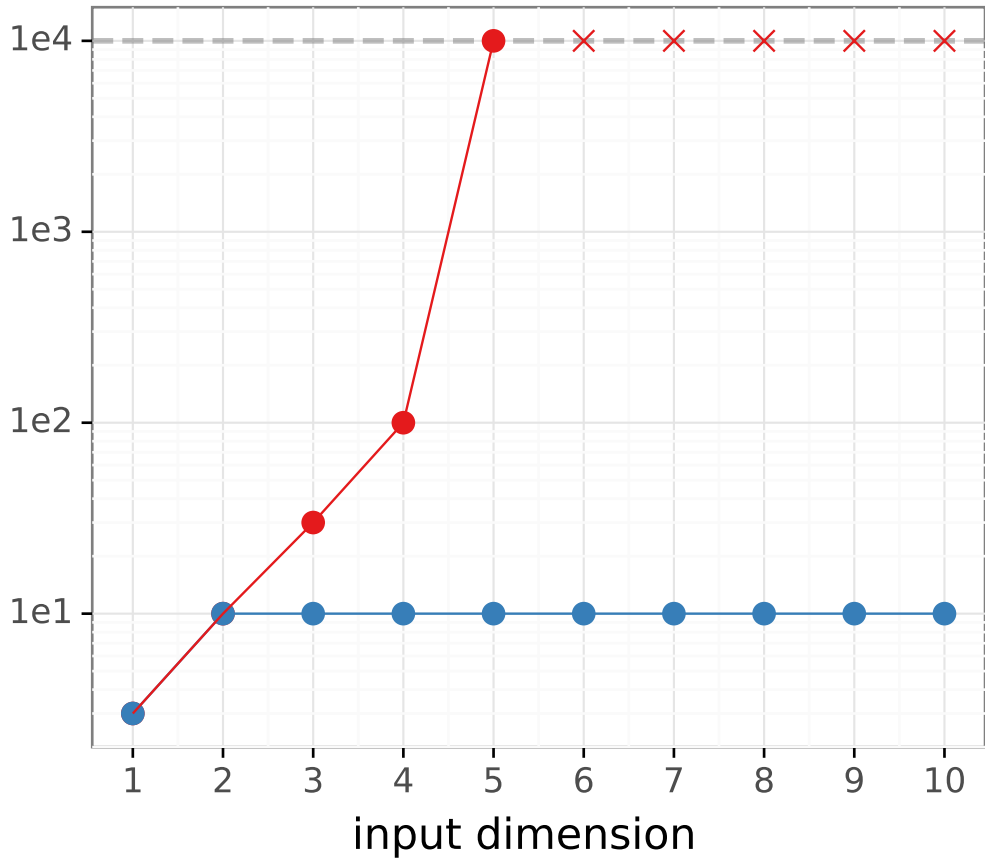

success

× False

● True

test

—● i.i.d.

—● dyadic
