# Supplementary material
Source: ML conference proceedings conference paper supplement (https://openreview.net/forum?id=rFb8y8Io5e9)

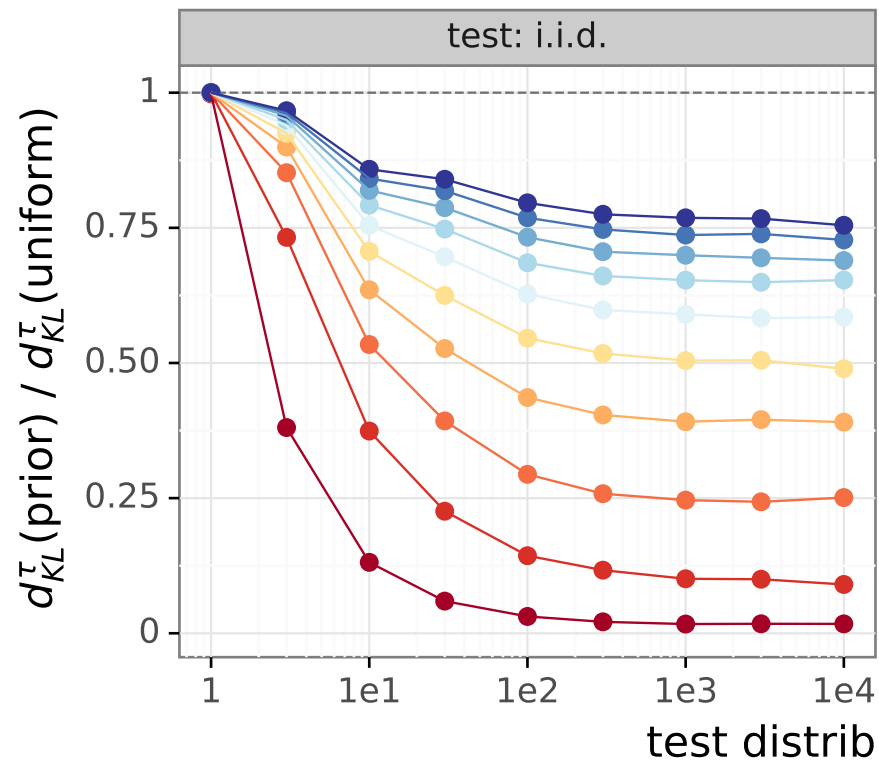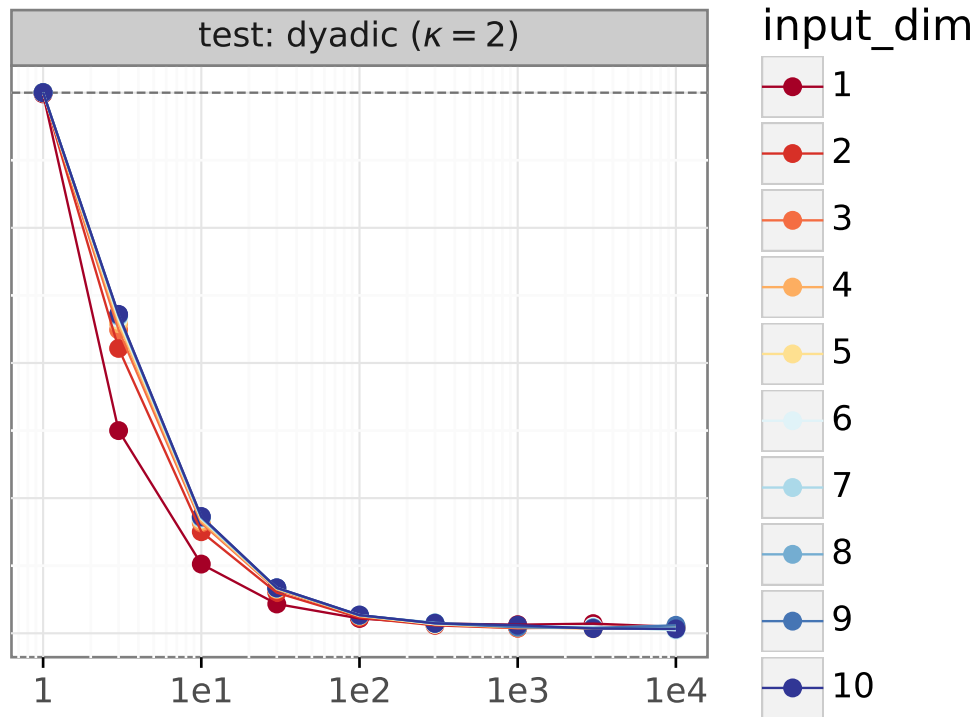

Supplement: supplementary_material [file attachment]

KL estimate ( $\tau = 10, \kappa = 2$ )

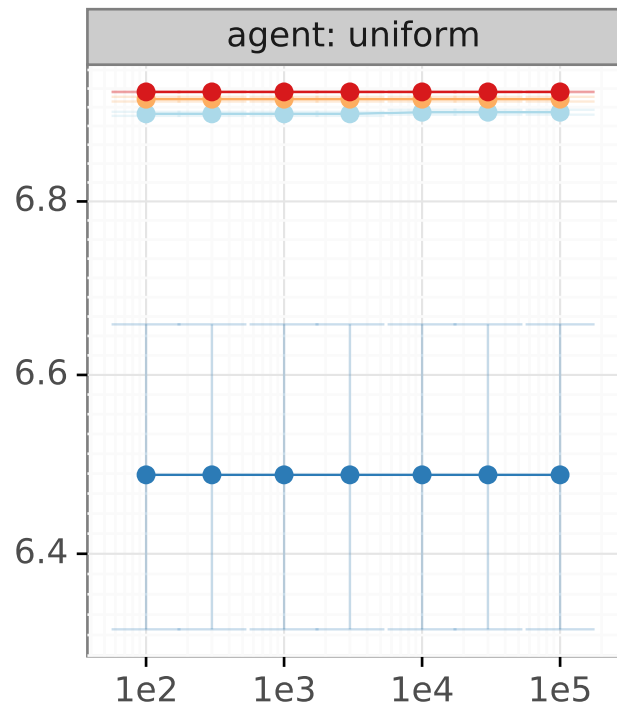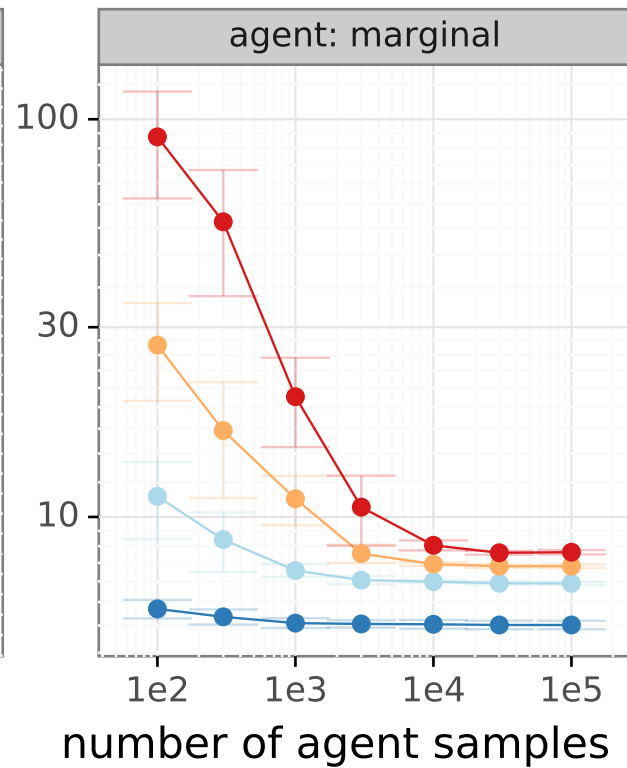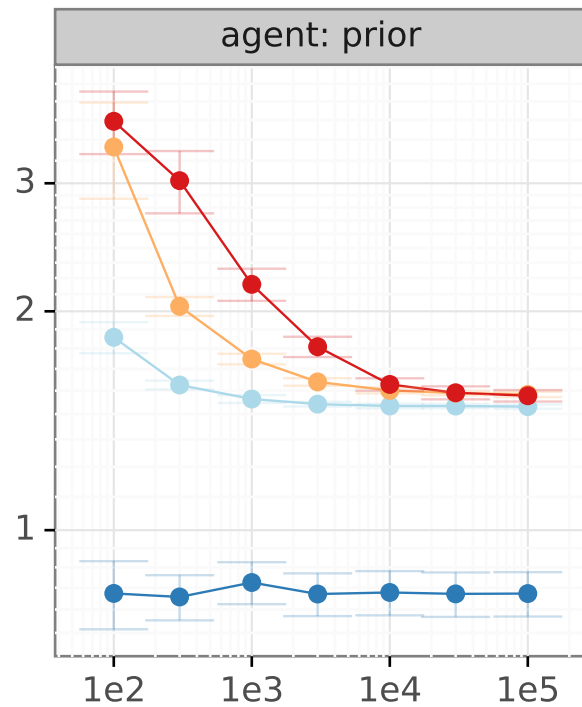

input\_dim

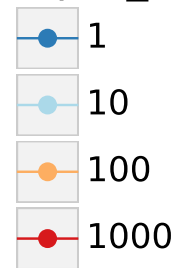

Supplement: supplementary_material [file attachment]

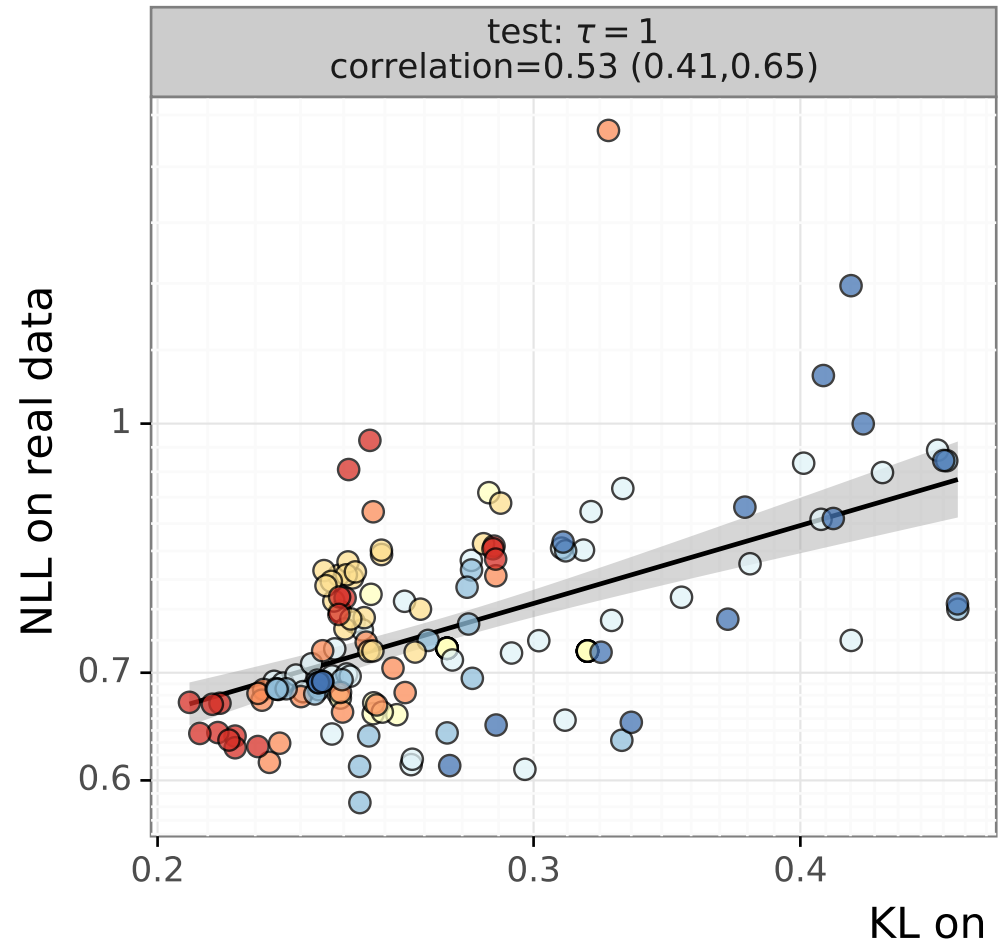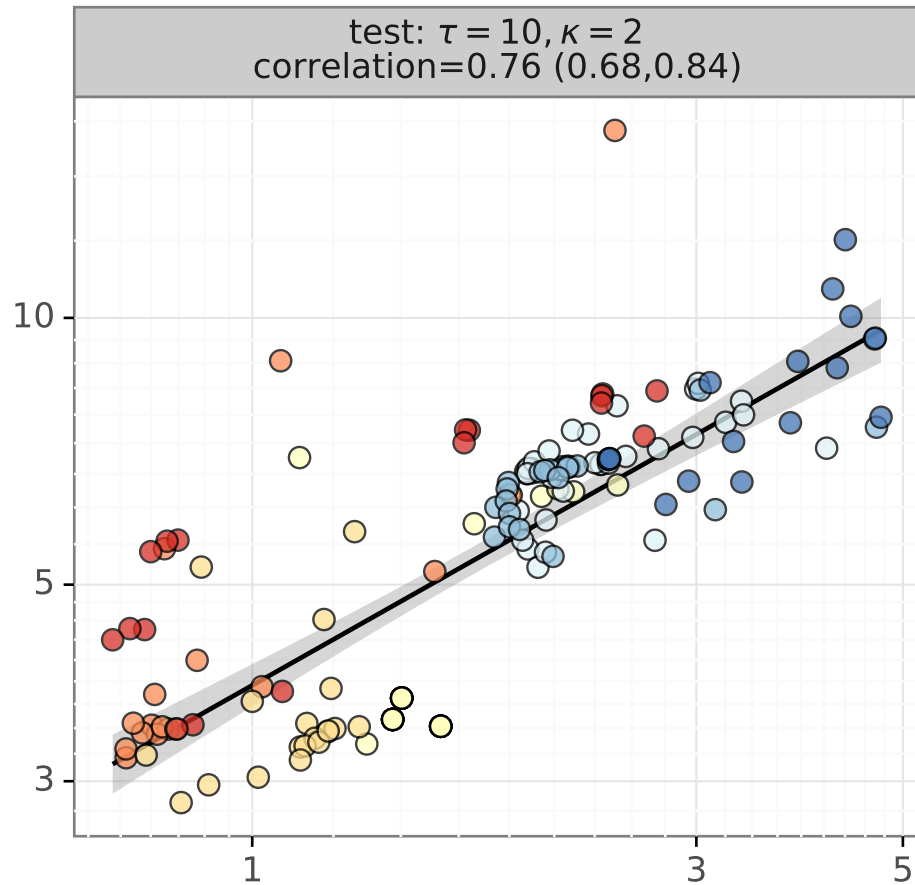

agent

- mlp
- ensemble
- dropout
- bbb
- hypermodel
- ensemble+
- sgmmc

Supplement: supplementary_material [file attachment]

normalized KL estimate ( $\tau = 10$ )

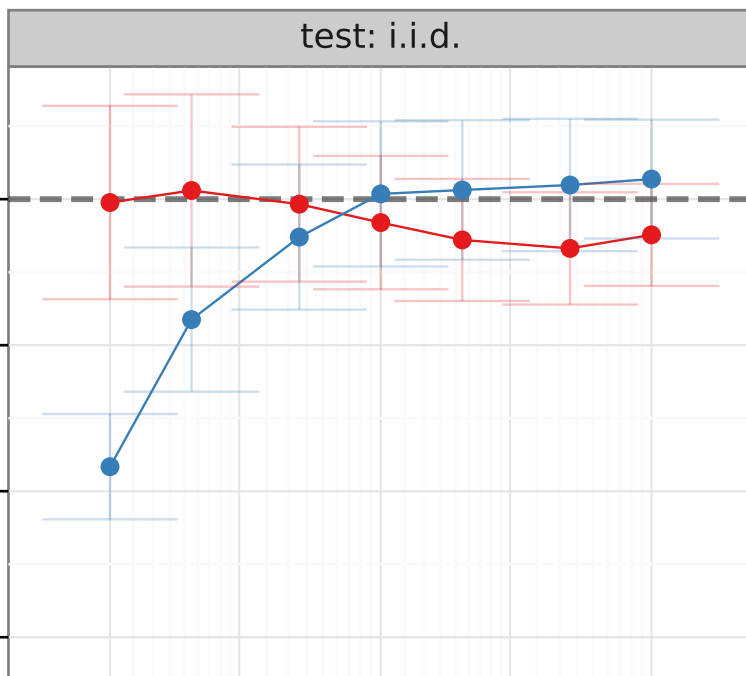

agent

- ensemble
- ensemble+

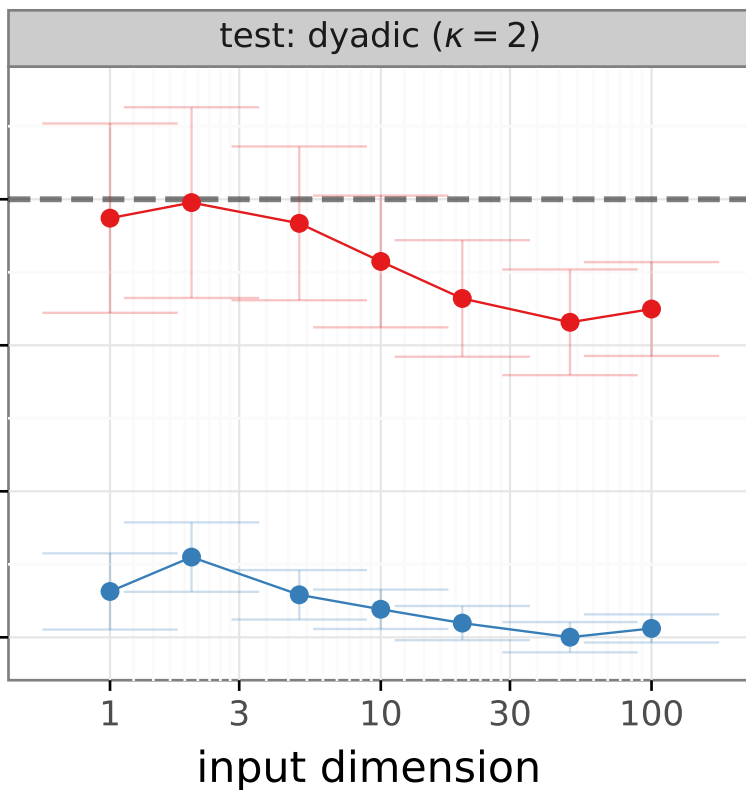

Supplement: supplementary_material [file attachment]

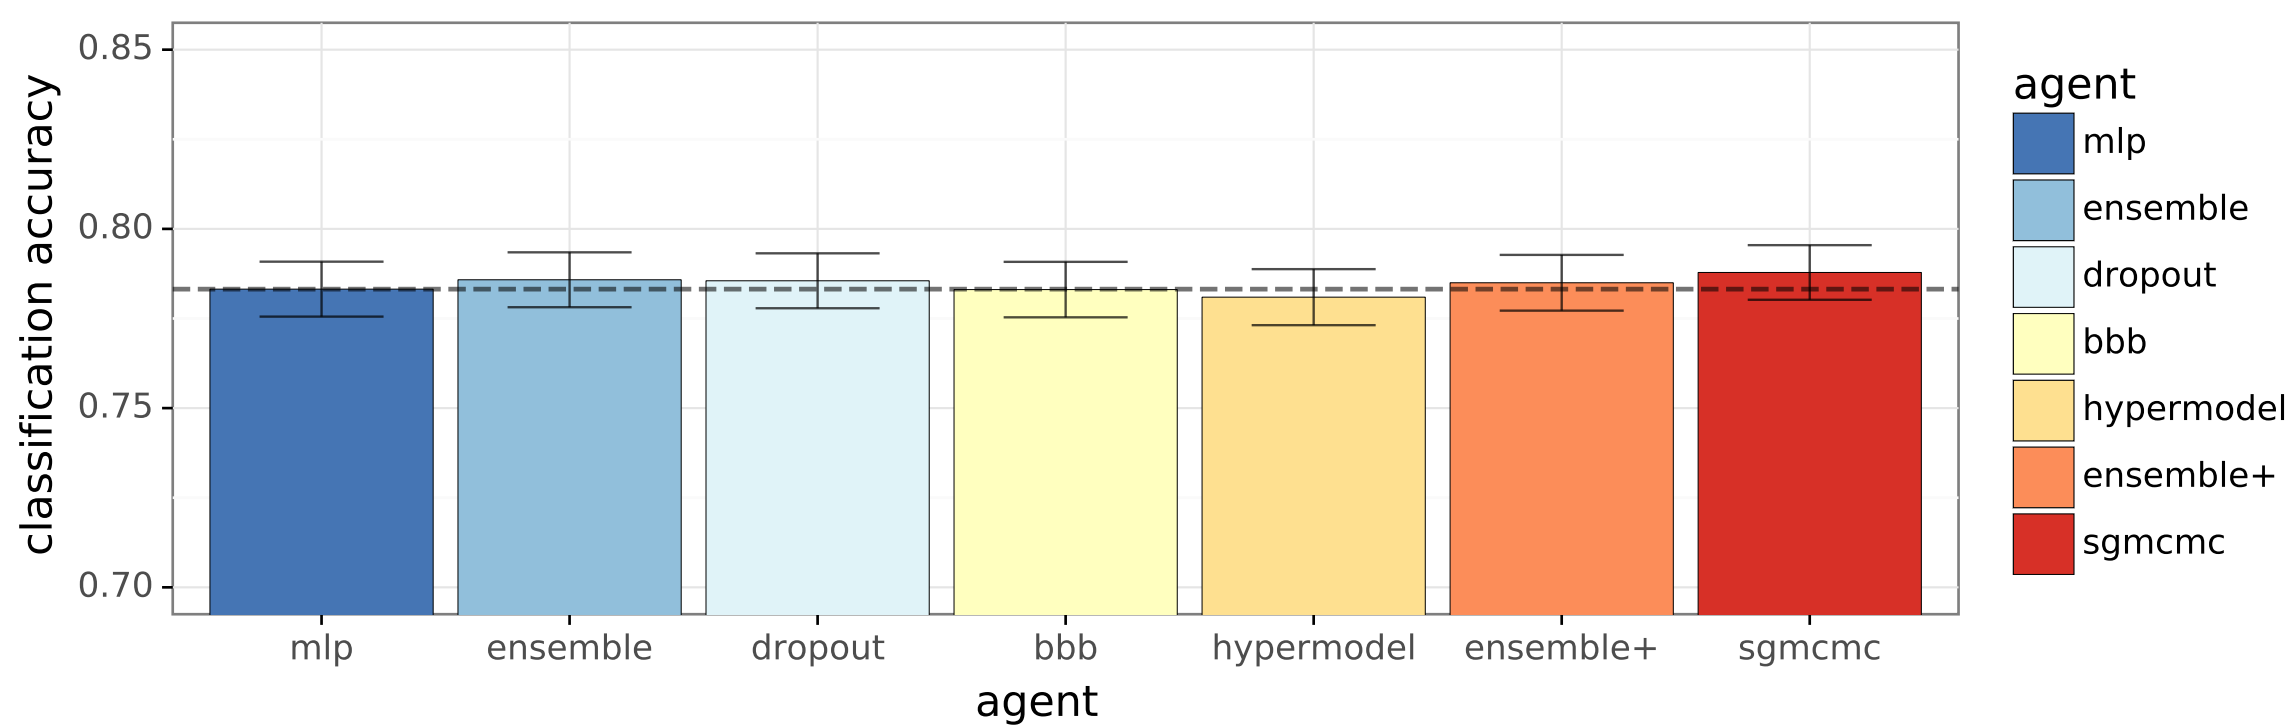

Supplement: supplementary_material [file attachment]

normalized KL estimate

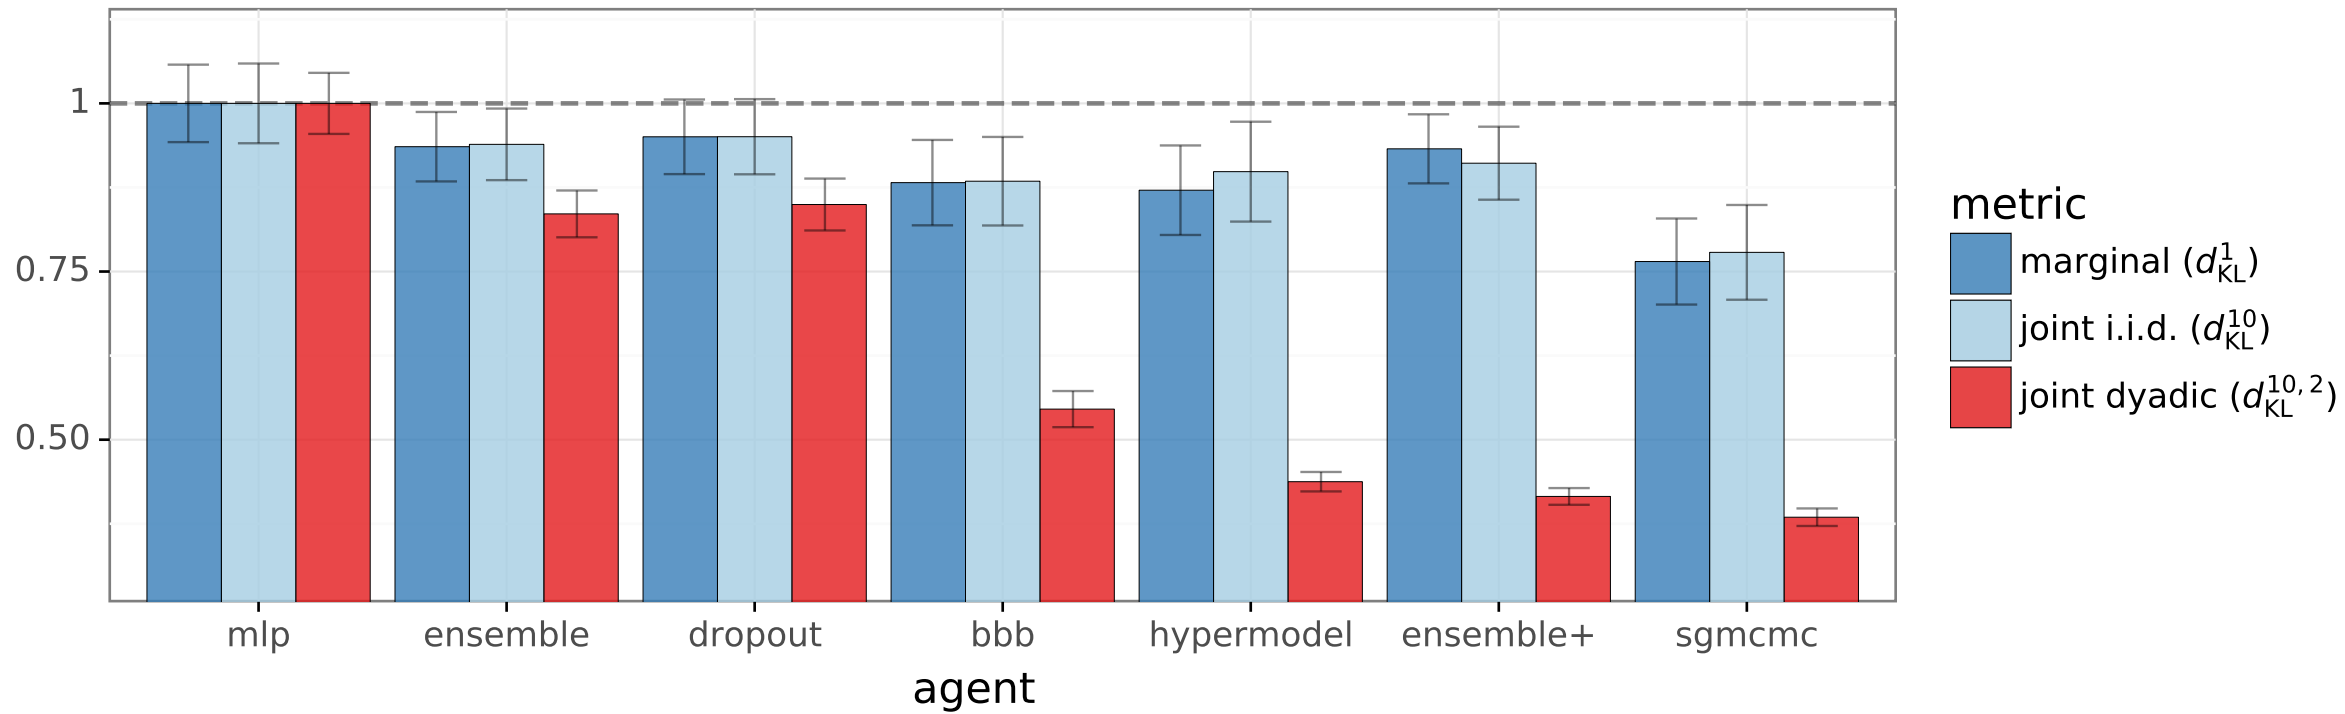

Supplement: supplementary_material [file attachment]

NLL on real data ( $\tau = 1$ )

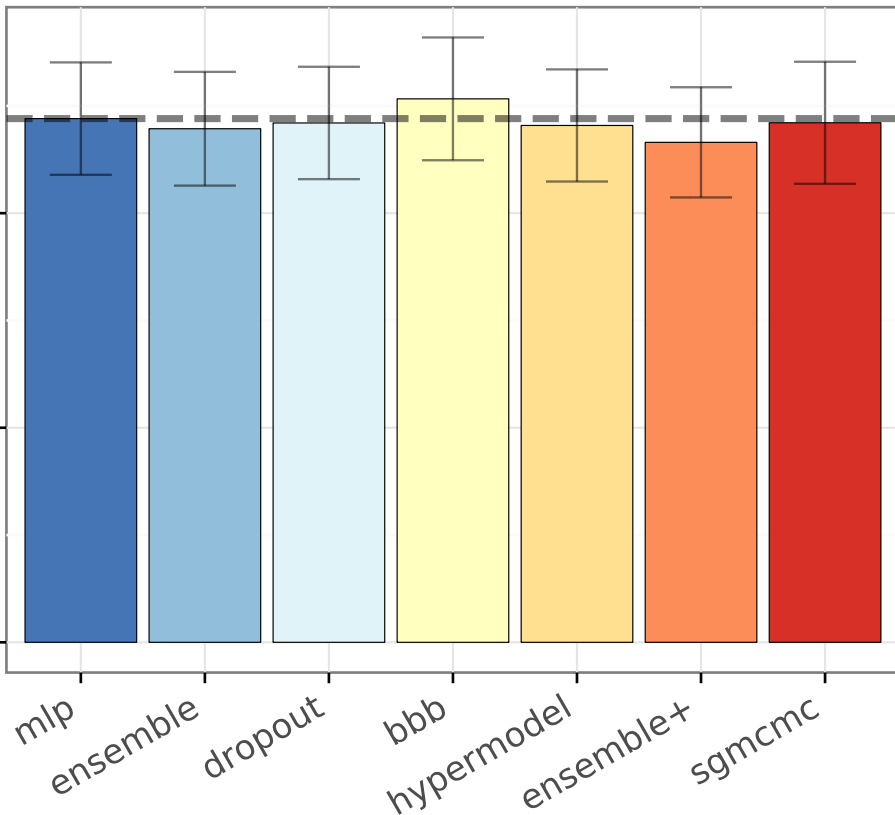

agent

- mlp
- ensemble
- dropout
- bbb
- hypermodel
- ensemble+
- sgmmcmc

agent

Supplement: supplementary_material [file attachment]

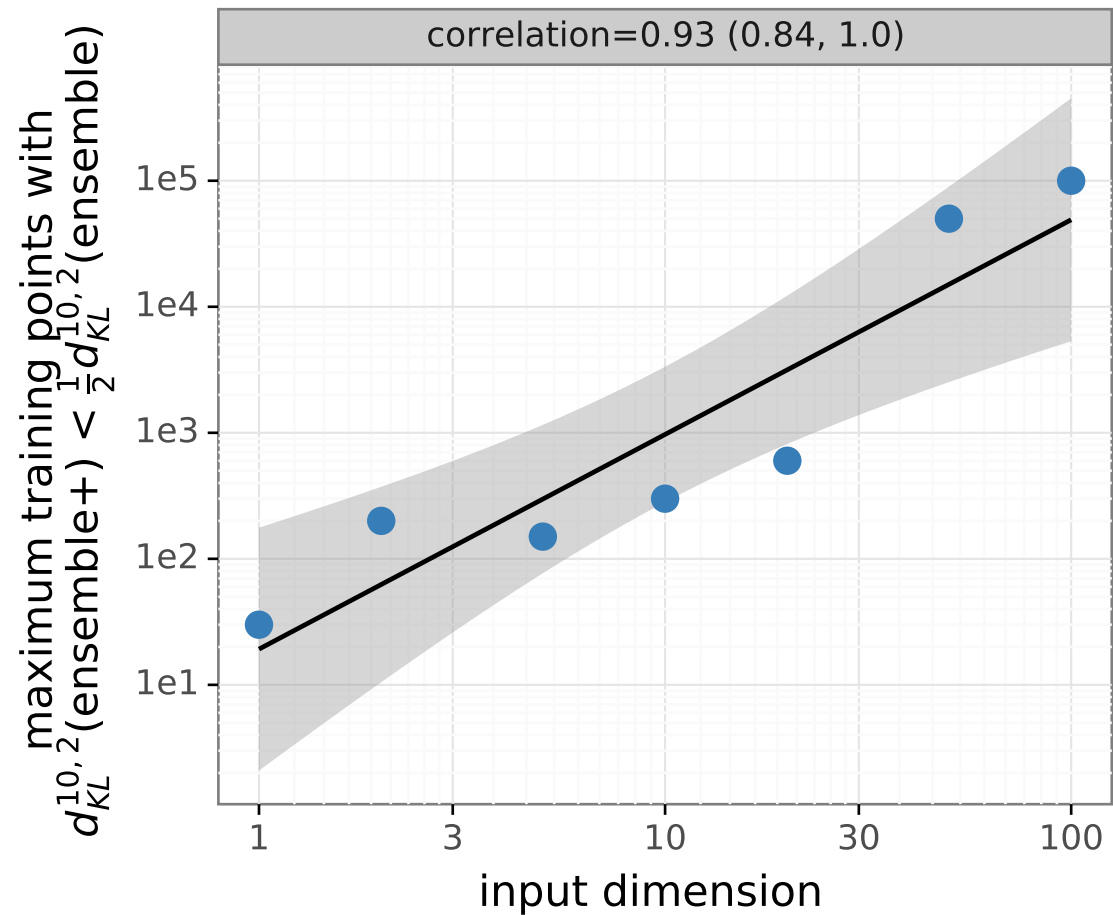

Supplement: supplementary_material [file attachment]

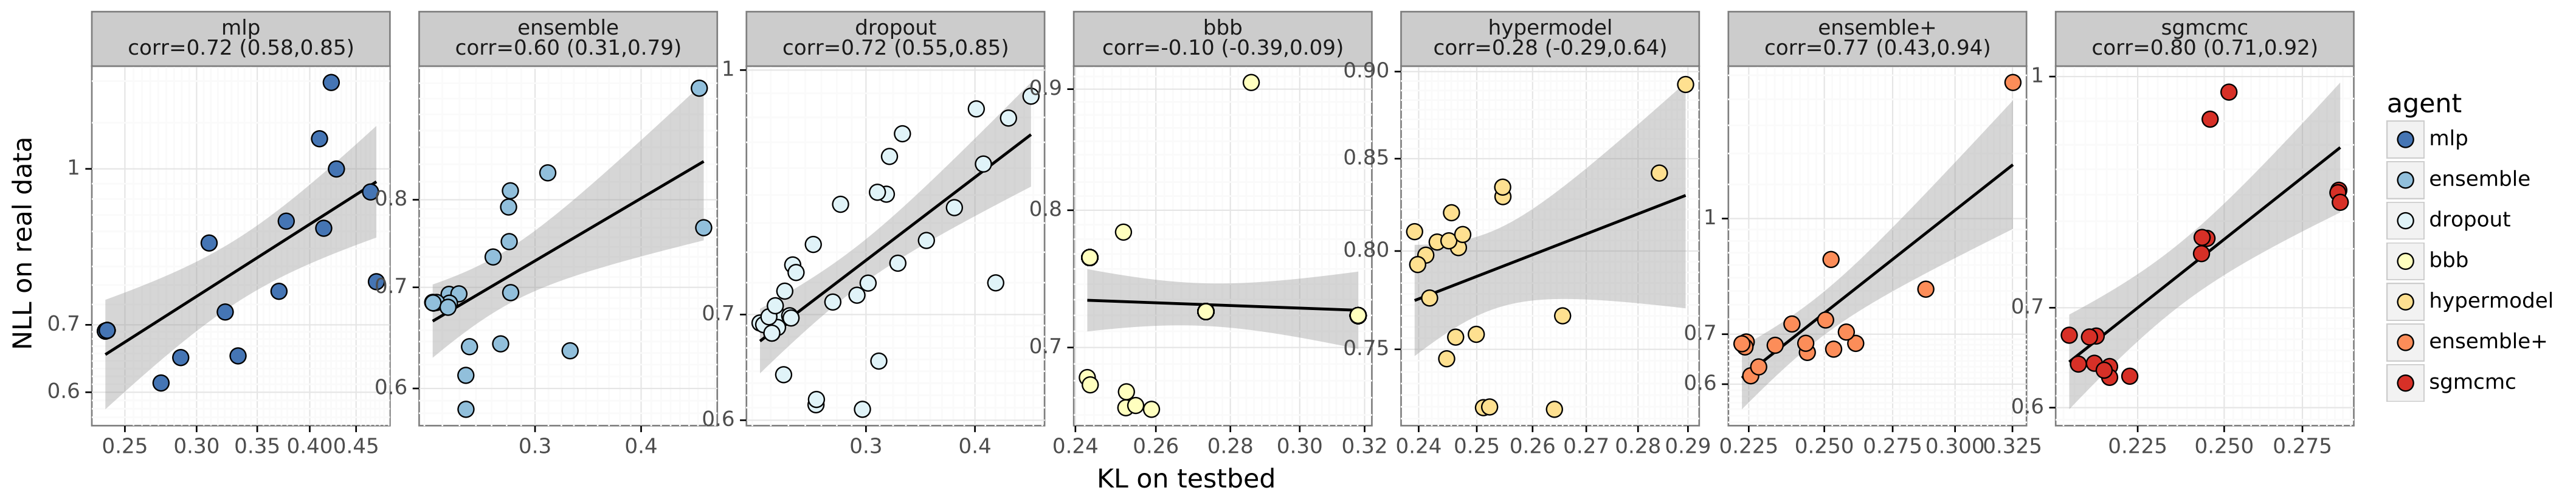

Supplement: supplementary_material [file attachment]

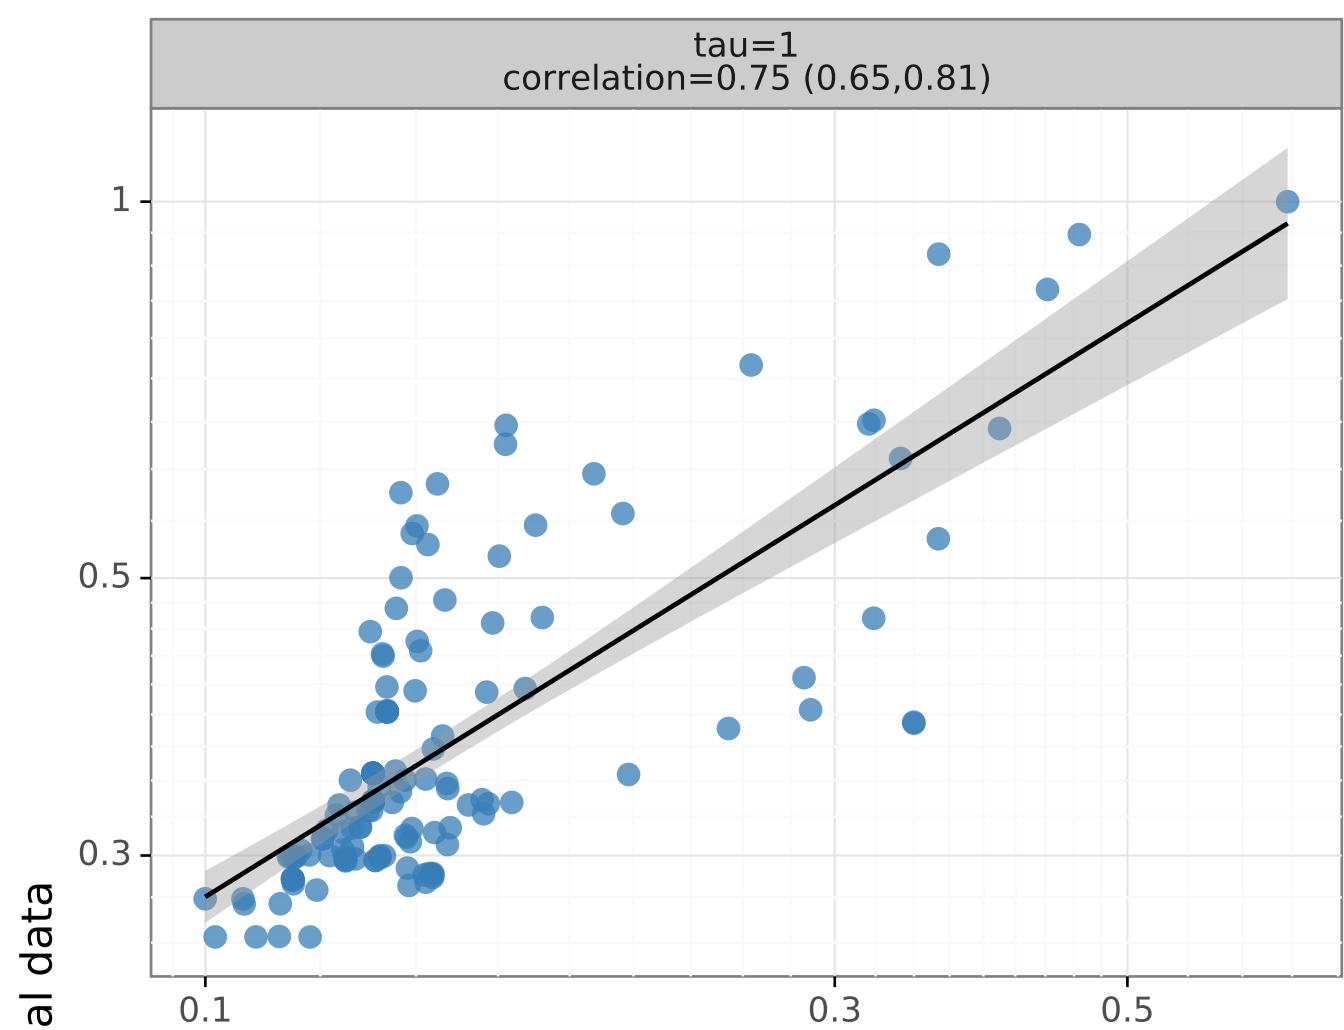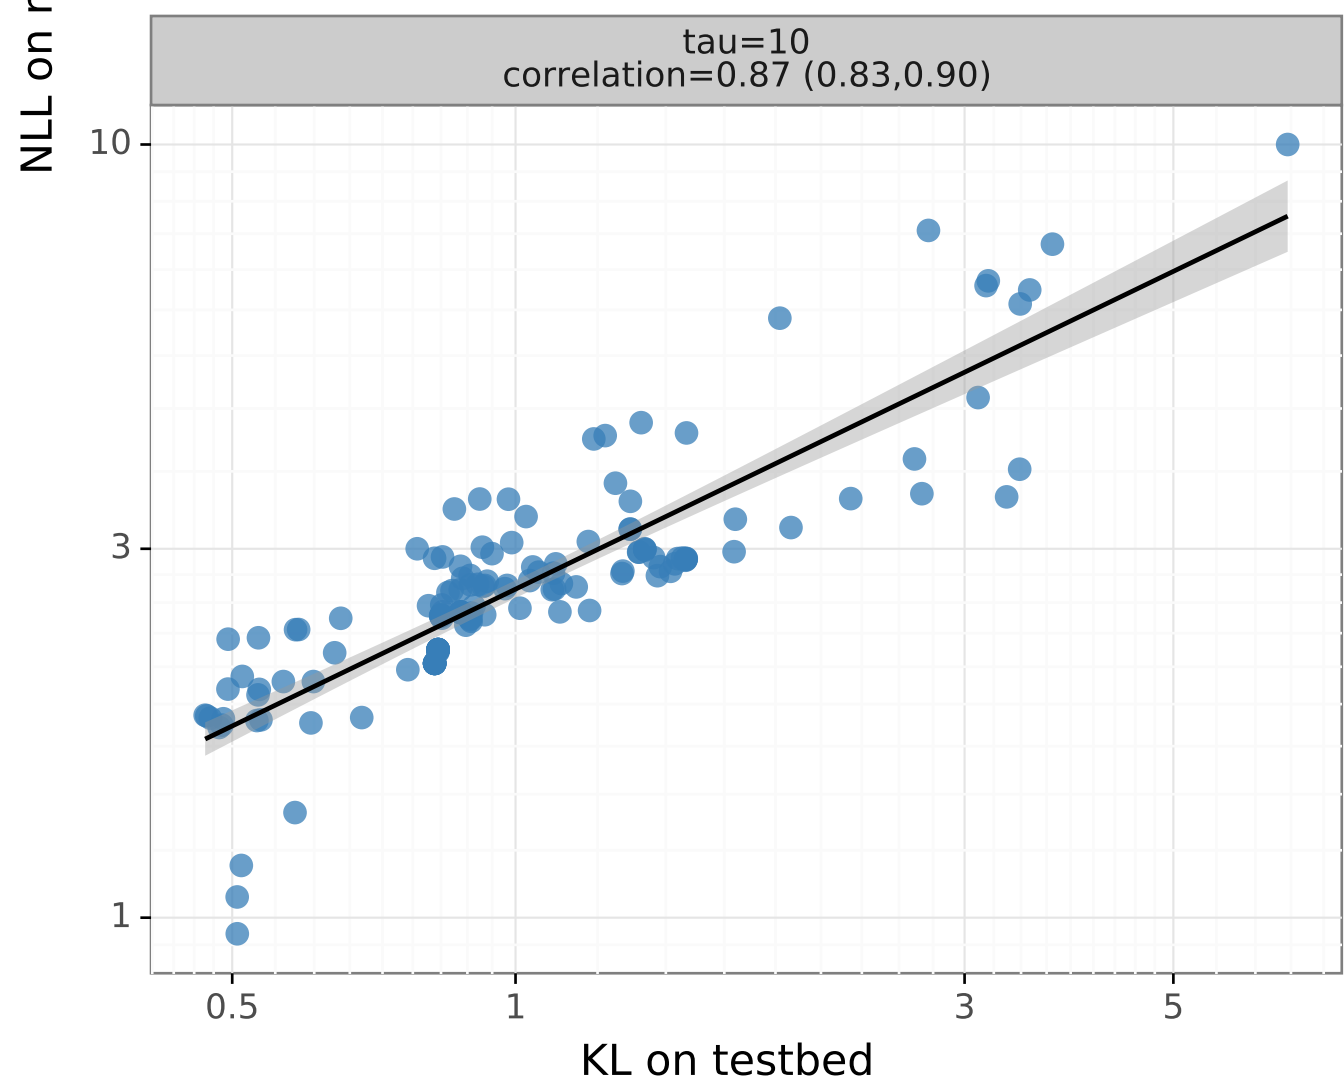

Supplement: supplementary_material [file attachment]

NLL on dataset ( $\tau = 10, \kappa = 2$ )

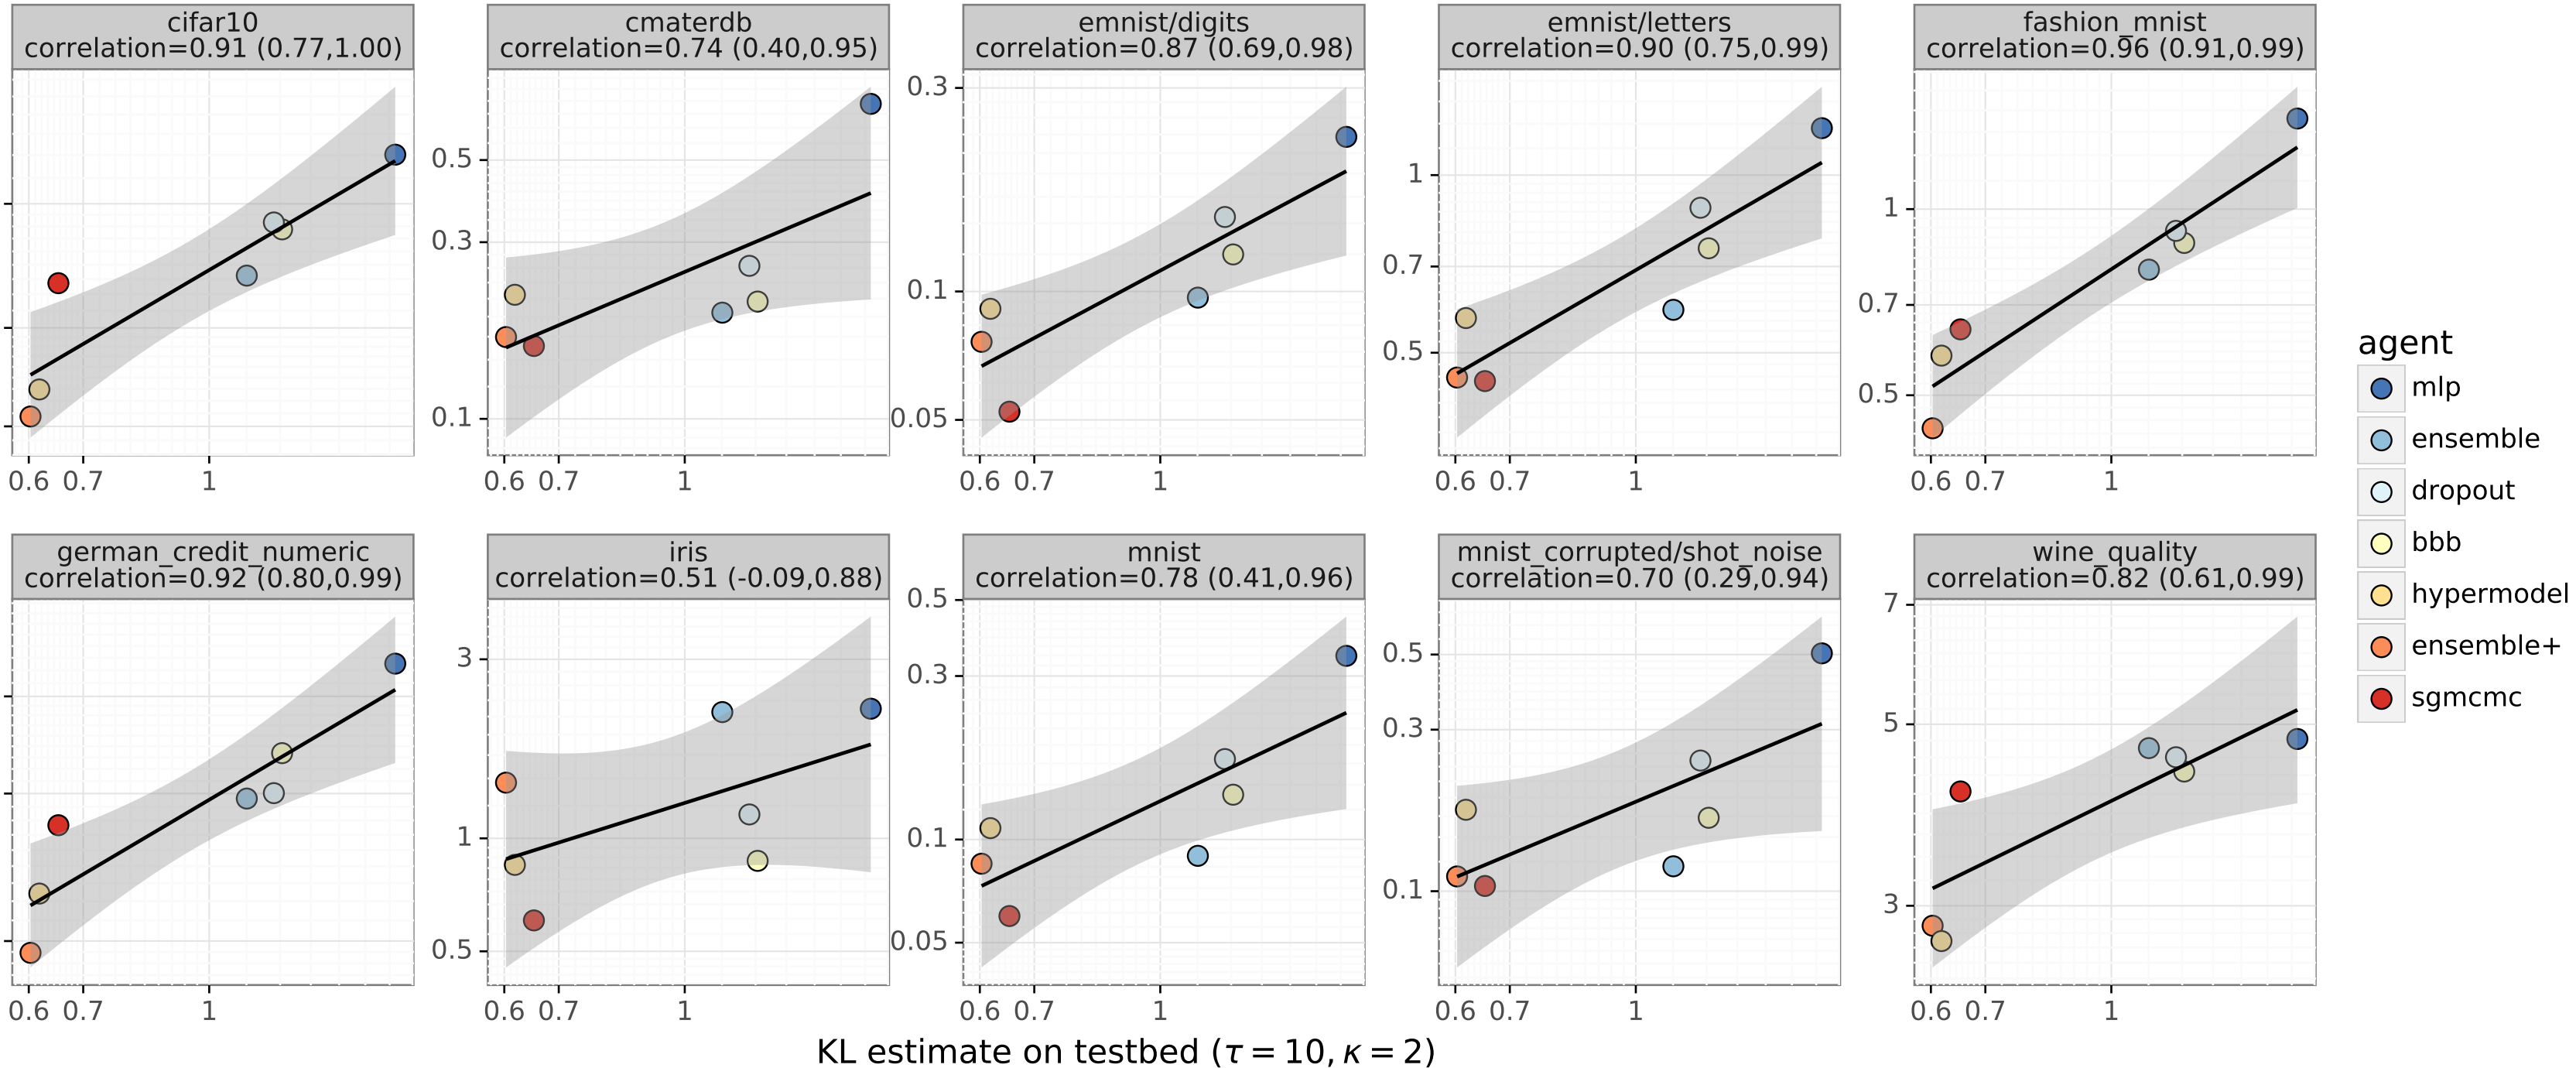

Supplement: supplementary_material [file attachment]

normalized KL estimate

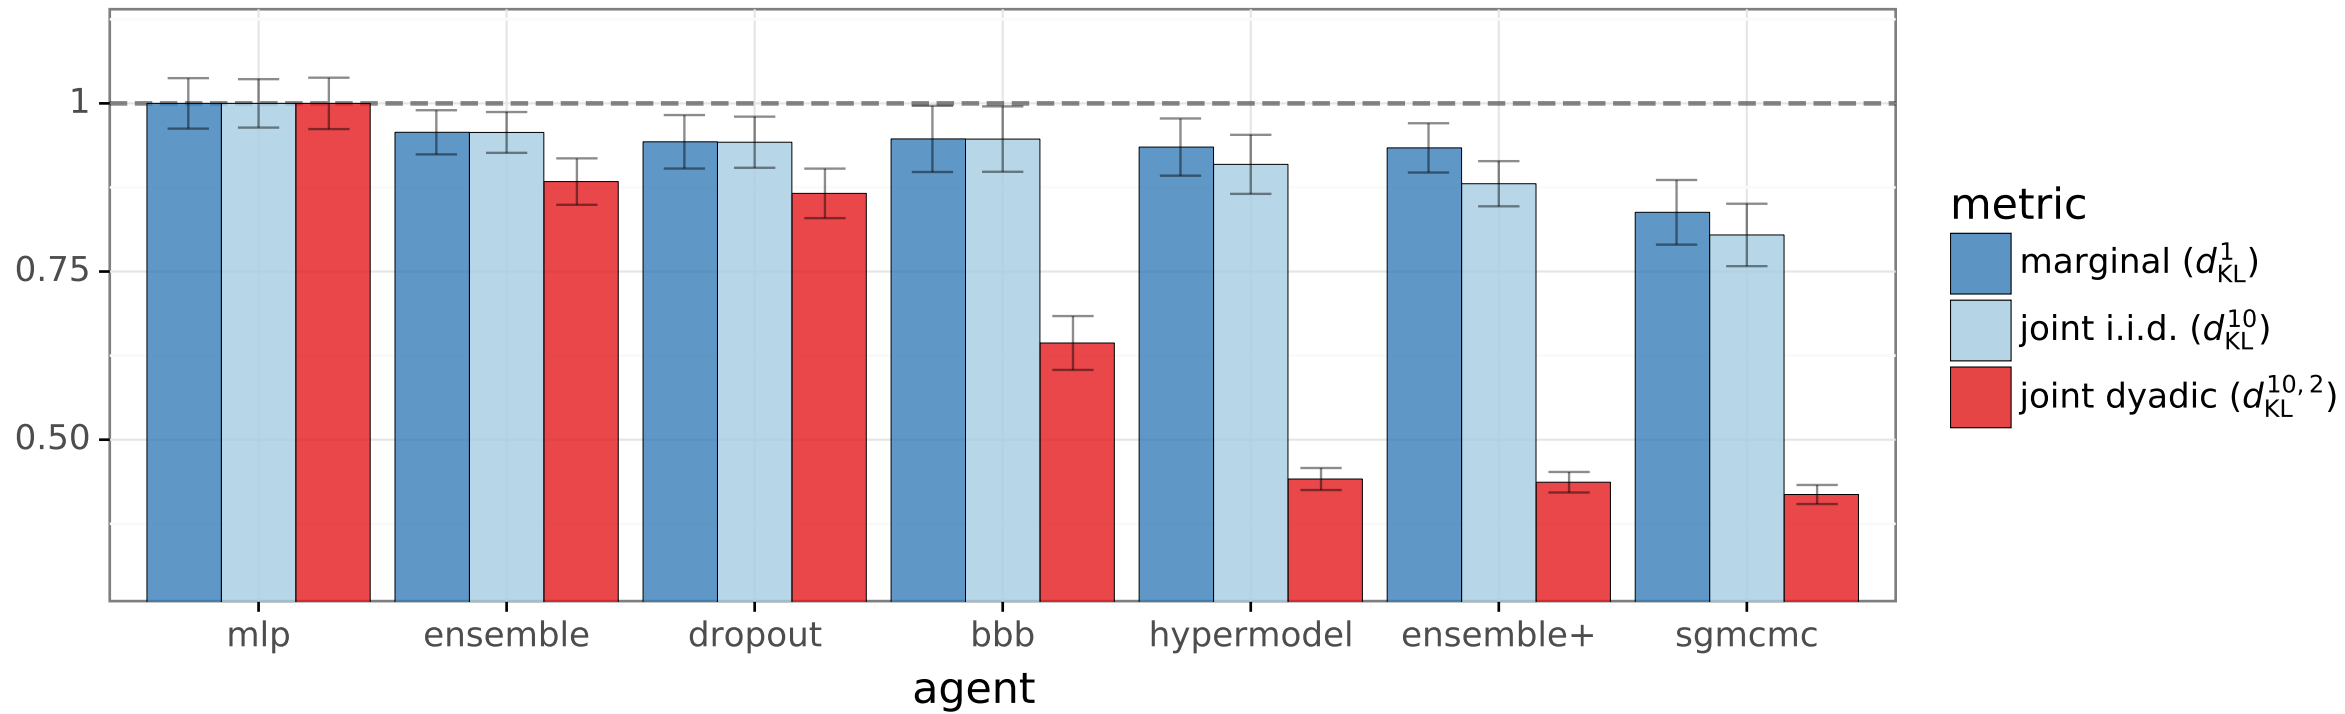

Supplement: supplementary_material [file attachment]

KL estimate ( $\tau = 10$ )

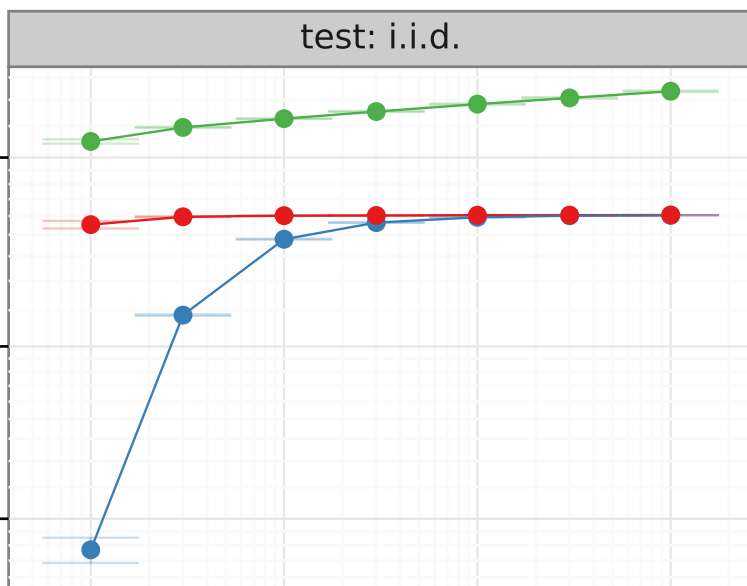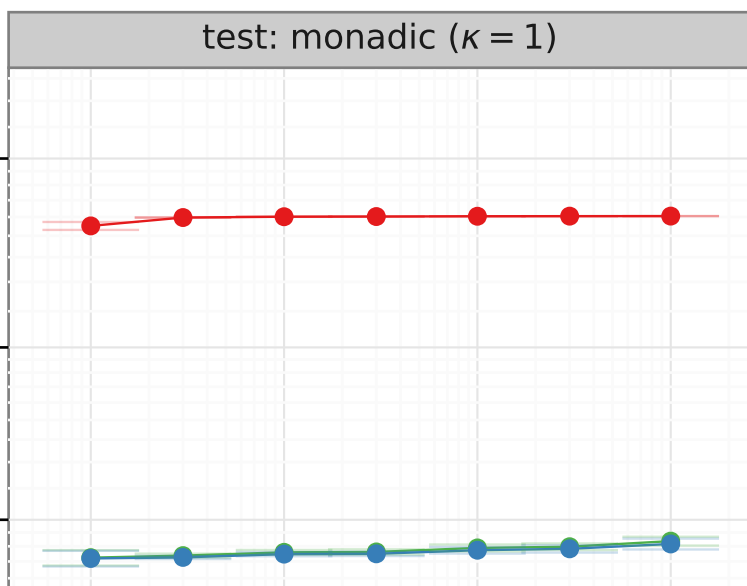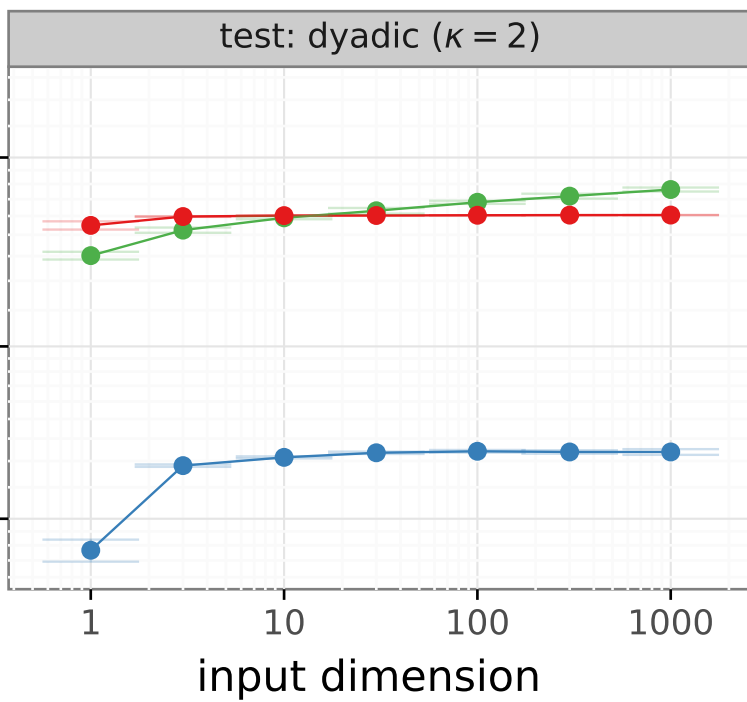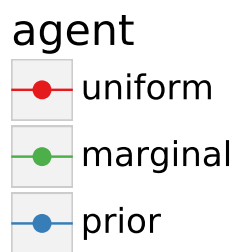

Supplement: supplementary_material [file attachment]

NLL on real data ( $\tau = 1$ )

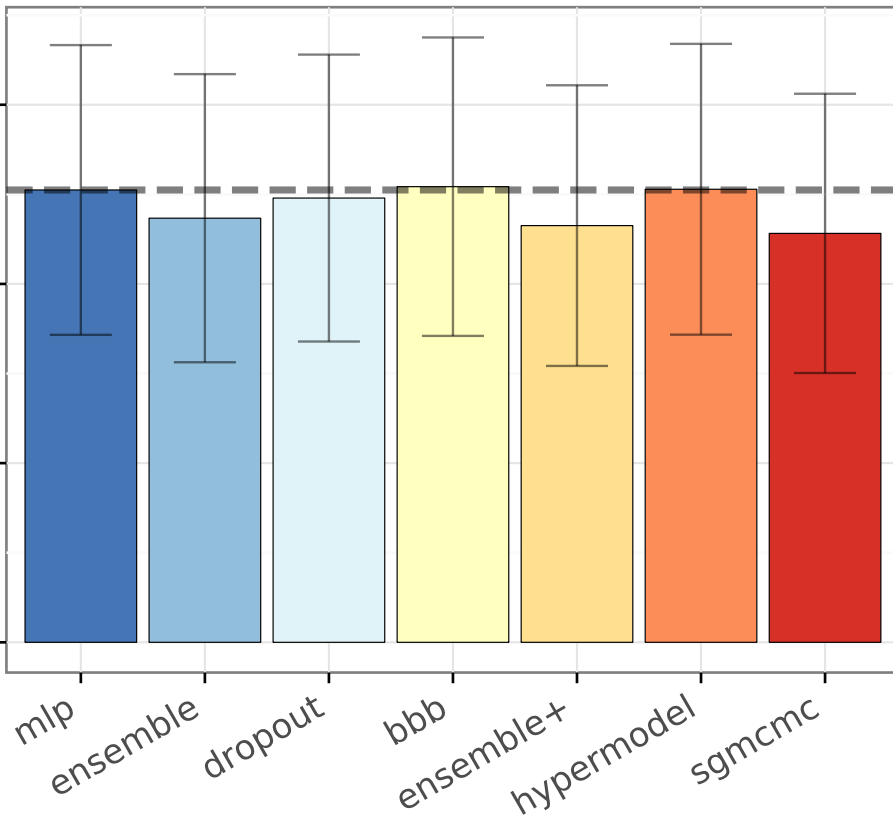

agent

- mlp
- ensemble
- dropout
- bbb
- ensemble+
- hypermodel
- sgmmcmc

agent

Supplement: supplementary_material [file attachment]

Beta( $\alpha, \alpha$ ) PDF

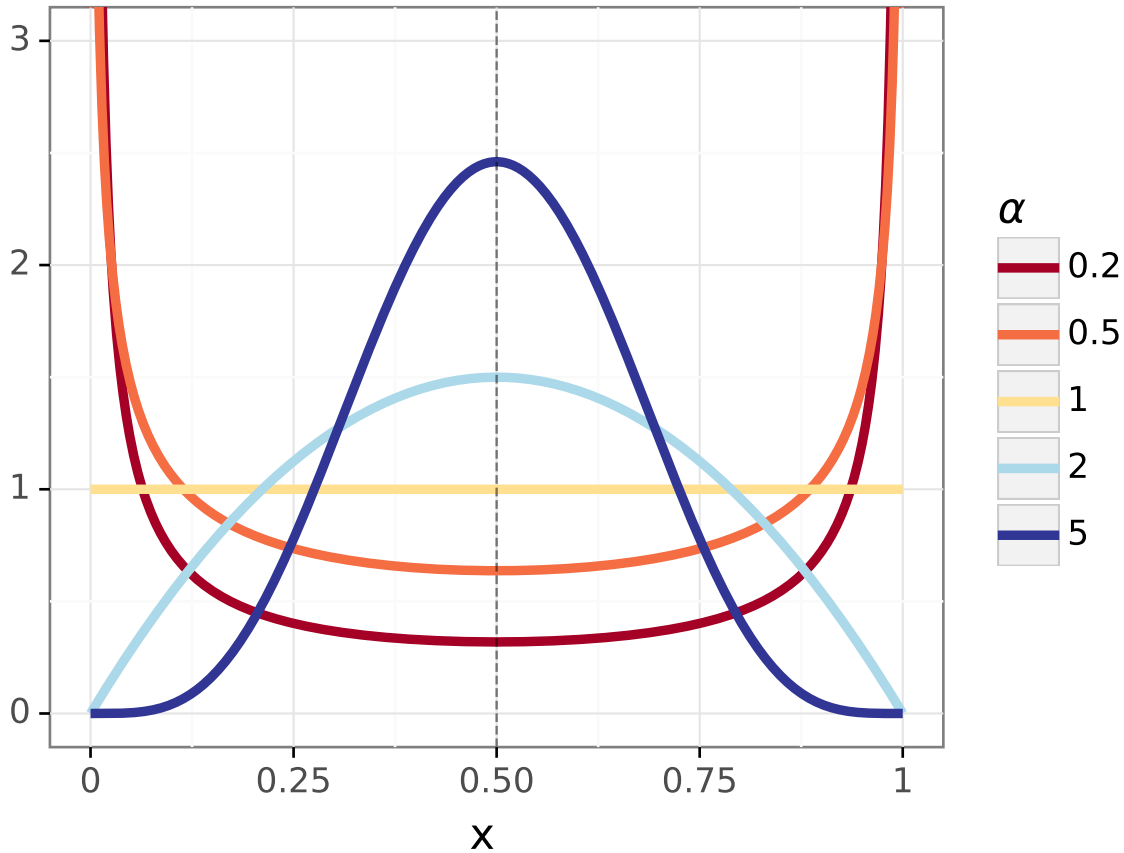

Supplement: supplementary_material [file attachment]
